# Supplementary material for: The preferred conformation of the tetrafluoro-1,3-dithietane⋯isopropylamine complex as revealed by rotational spectroscopy
Source: Royal Society of Chemistry journal article supplement (doi:10.1039/d0cp05033d), 2020-01-01
Supplement: d0cp05033d1.pdf [file d0cp05033d1.pdf]

*ESI*

The preferred conformation of the tetrafluoro-1,3-dithietane ···isopropylamine  
complex revealed by rotational spectroscopy

Yan Jin, Tao Lu and Gang Feng\*

School of Chemistry and Chemical Engineering, Chongqing University, Daxuecheng South Rd. 55, 401331  
Chongqing, China

**Content:**

- 1) Figure S1: B3LYP-D3(BJ)/6-311++G(d,p) calculated spectroscopic parameters of isomers **III** and **IV** of the C<sub>2</sub>S<sub>2</sub>F<sub>4</sub>-IPA complex
- 2) Figure S2: Overlap of the *n* donor orbital with the C-S anti-bonding orbital of isomers **I** and **II**.
- 3) Figure S3: The interconversion barrier connecting isomers **I** and **II**, and isomers **I** and **III**.
- 4) Figure S4: The molecular sketch of C<sub>2</sub>F<sub>4</sub>S<sub>2</sub> complexes with NH<sub>3</sub>, MA and EA.
- 5) Table S1 and S2: Experimental transitions frequencies of isomers **I** and **II** of C<sub>2</sub>F<sub>4</sub>S<sub>2</sub>-IPA complex.

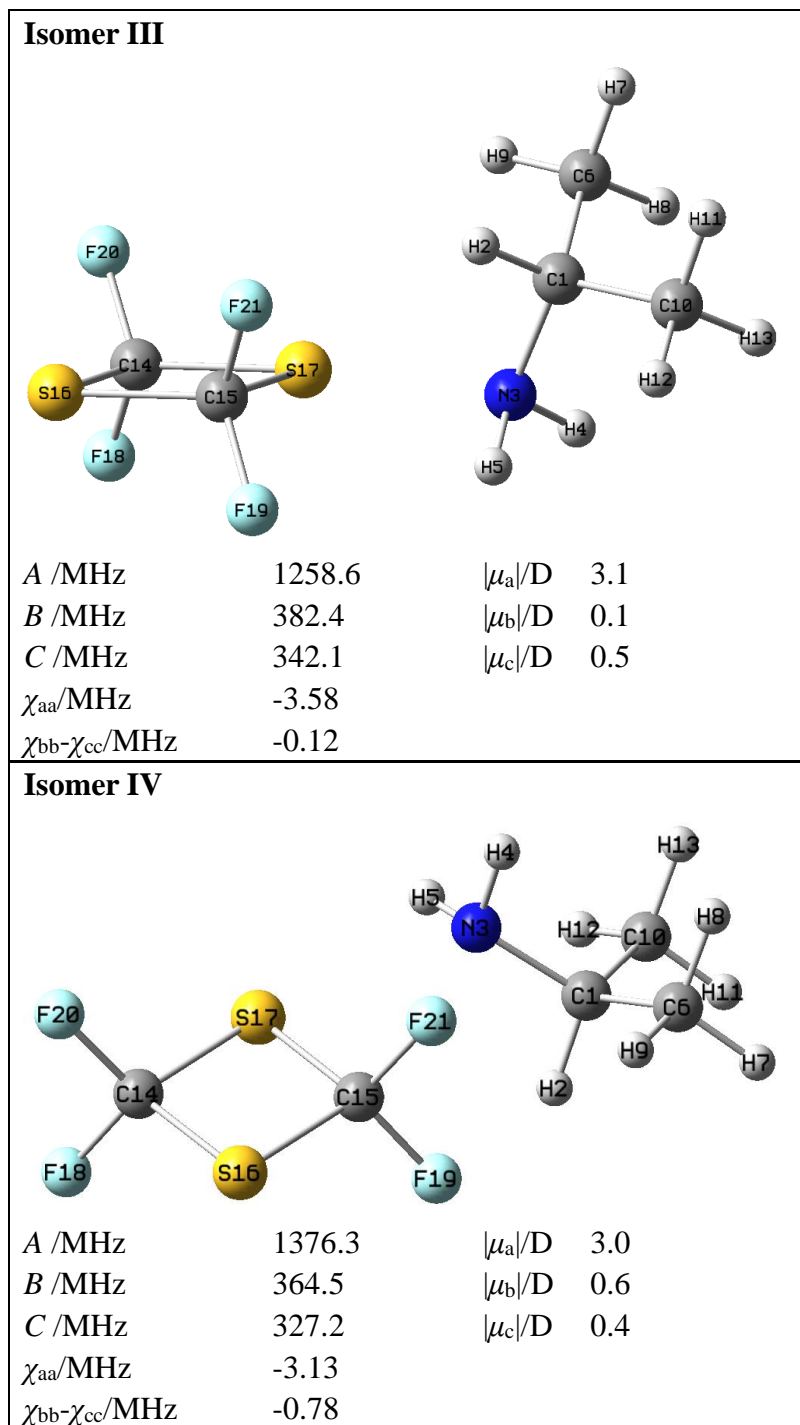

Fig. S1 B3LYP-D3(BJ)/6-311++G(d,p) calculated spectroscopic parameters of isomers **III** and **IV** of the  $C_2S_2F_4$ -IPA complex.

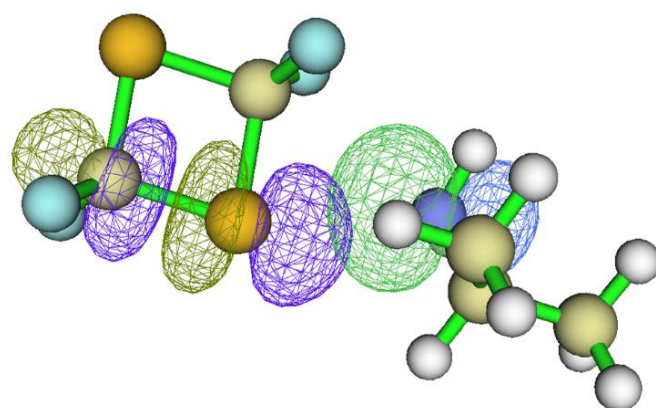

**Isomer I**

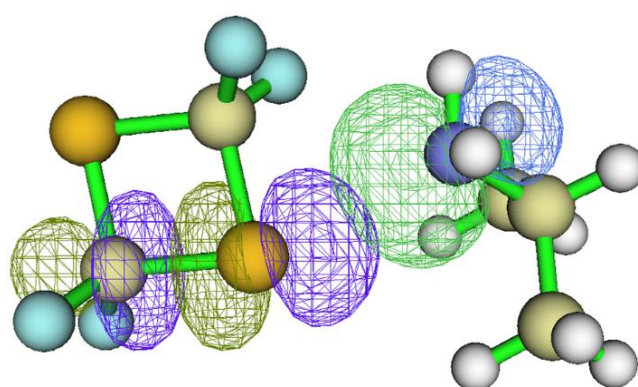

**Isomer II**

Fig. S2 Overlap of the n donor orbital with the C-S anti-bonding orbital.

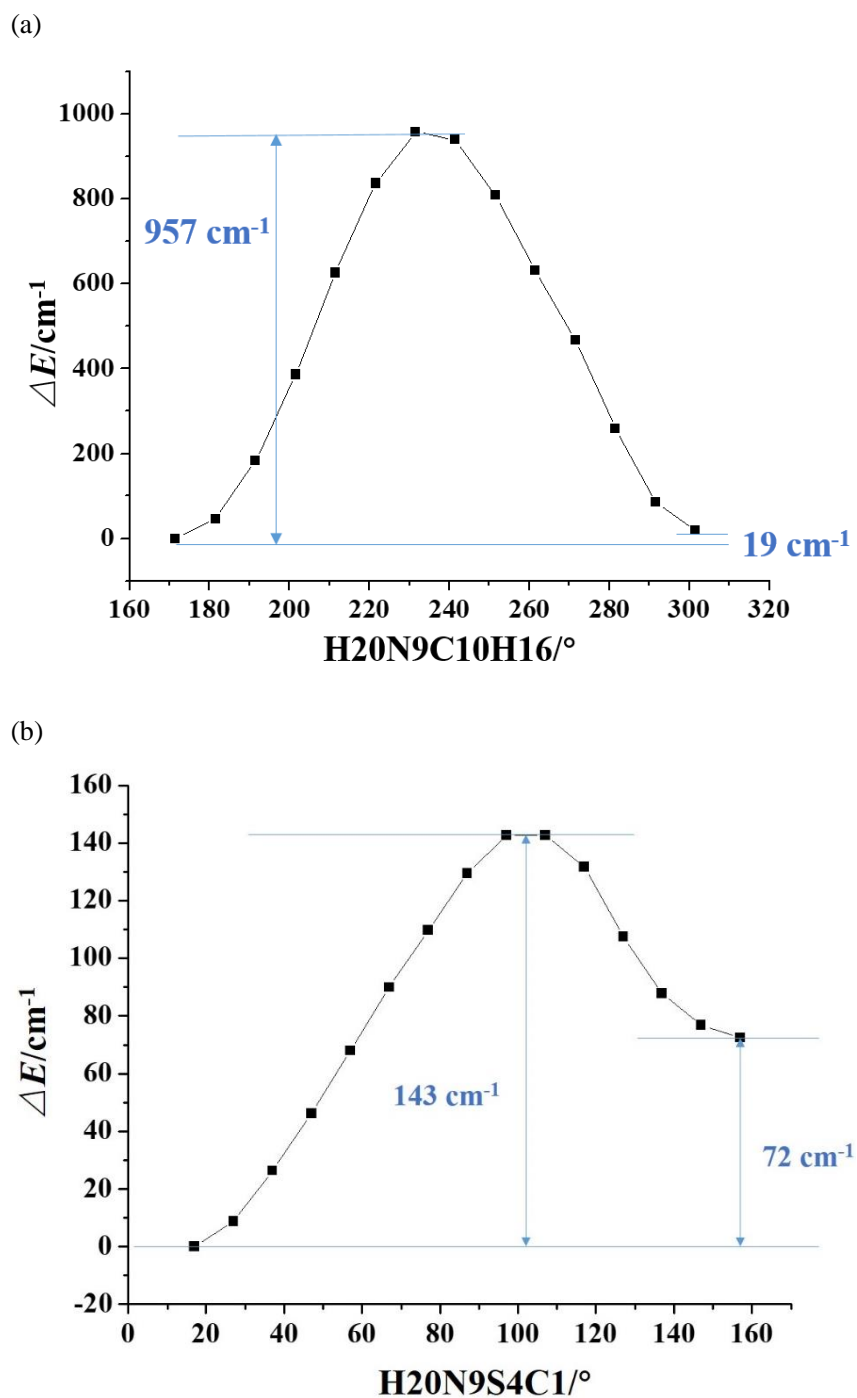

Fig. S3 The potential energy curves connecting conformational interconversion between (a) isomers I and II, and (b) isomers I and III.

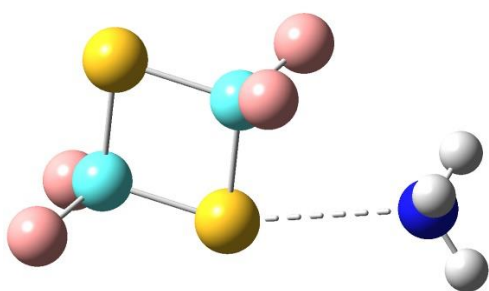

a) The most stable isomer of the  $C_2F_4S_2-NH_3$  complex.

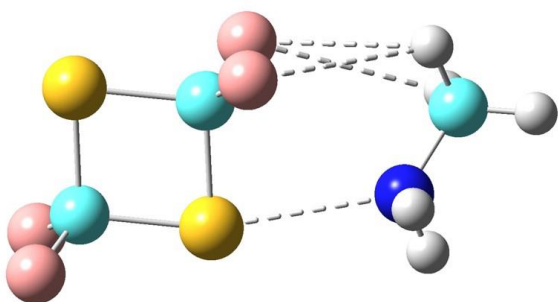

**Isomer I 0**

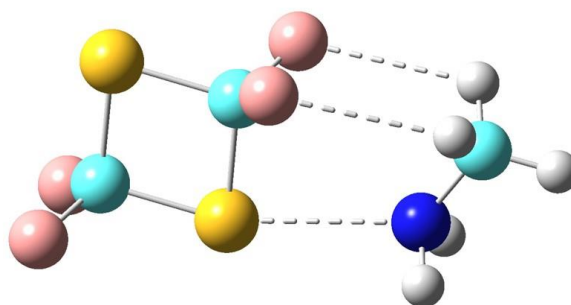

**Isomer I +14  $cm^{-1}$**

b) Two isomers of the  $C_2F_4S_2-MA$  complex in a relative energy window of  $300\text{ cm}^{-1}$ .

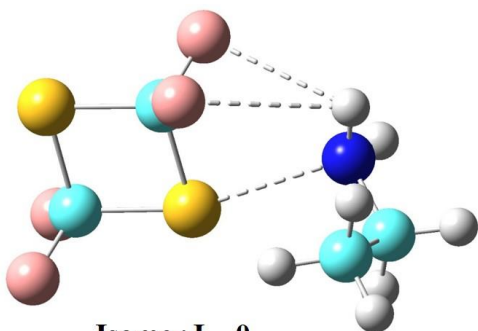

**Isomer I 0**

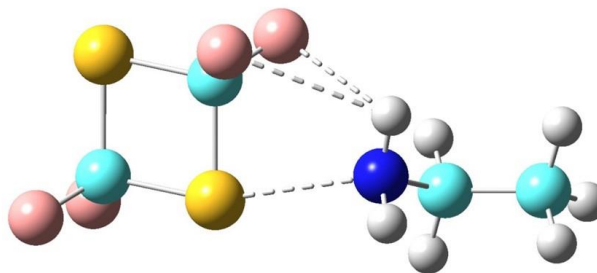

**Isomer II +56  $cm^{-1}$**

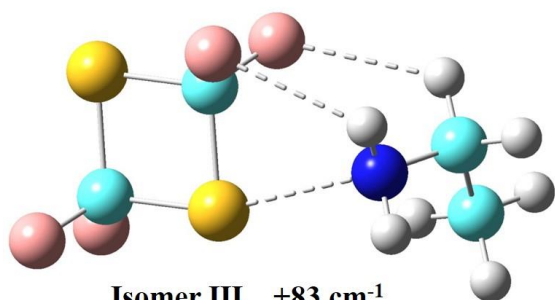

**Isomer III +83  $cm^{-1}$**

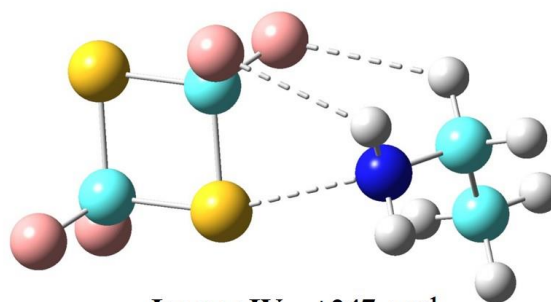

**Isomer IV +247  $cm^{-1}$**

c) Four isomers of the  $C_2F_4S_2-EA$  complex in a relative energy window of  $300\text{ cm}^{-1}$ .

Fig. S4 molecular sketch of the  $C_2F_4S_2$  complexes with  $NH_3$ , MA and EA.

Table S1. Experimental transitions frequencies of isomer I of the C<sub>2</sub>F<sub>4</sub>S<sub>2</sub>-IPA complex.

| $J'_{Ka'Kc'}$ | $F'$ | $J''_{Ka''Kc''}$ | $F''$ | $V_{obs.}/\text{MHz}$ | $Obs.-calc./\text{MHz}$ |
|---------------|------|------------------|-------|-----------------------|-------------------------|
| 8 0 8         | 9    | 7 0 7            | 8     | 5722.3801             | 0.0003                  |
| 8 0 8         | 8    | 7 0 7            | 7     | 5722.3768             | -0.0001                 |
| 8 0 8         | 7    | 7 0 7            | 6     | 5722.3547             | -0.0034                 |
| 8 1 8         | 9    | 7 1 7            | 8     | 5646.3428             | 0.0008                  |
| 8 1 8         | 8    | 7 1 7            | 7     | 5646.3229             | 0.0017                  |
| 8 1 8         | 7    | 7 1 7            | 6     | 5646.3264             | 0.0025                  |
| 8 1 7         | 9    | 7 1 6            | 8     | 5938.9012             | 0.0000                  |
| 8 1 7         | 8    | 7 1 6            | 7     | 5938.8788             | -0.0023                 |
| 8 1 7         | 7    | 7 1 6            | 6     | 5938.8814             | -0.0007                 |
| 8 2 7         | 9    | 7 2 6            | 8     | 5802.5978             | 0.0016                  |
| 8 2 7         | 8    | 7 2 6            | 7     | 5802.5350             | 0.0025                  |
| 8 2 7         | 7    | 7 2 6            | 6     | 5802.5869             | 0.0002                  |
| 8 2 6         | 9    | 7 2 5            | 8     | 5897.9775             | -0.0004                 |
| 8 2 6         | 8    | 7 2 5            | 7     | 5897.9071             | -0.0019                 |
| 8 2 6         | 7    | 7 2 5            | 6     | 5897.9682             | -0.0004                 |
| 9 0 9         | 9    | 8 0 8            | 8     | 6415.5167             | -0.0033                 |
| 9 0 9         | 8    | 8 0 8            | 7     | 6415.5015             | -0.0033                 |
| 9 0 9         | 10   | 8 0 8            | 9     | 6415.5225             | 0.0008                  |
| 9 1 8         | 9    | 8 1 7            | 8     | 6670.8116             | 0.0034                  |
| 9 1 8         | 8    | 8 1 7            | 7     | 6670.8040             | -0.0025                 |
| 9 1 8         | 10   | 8 1 7            | 9     | 6670.8211             | -0.0008                 |
| 9 1 9         | 9    | 8 1 8            | 8     | 6346.2104             | 0.0014                  |
| 9 1 9         | 8    | 8 1 8            | 7     | 6346.2104             | 0.0010                  |
| 9 1 9         | 10   | 8 1 8            | 9     | 6346.2210             | -0.0030                 |
| 9 2 7         | 9    | 8 2 6            | 8     | 6651.8023             | -0.0011                 |
| 9 2 7         | 8    | 8 2 6            | 7     | 6651.8451             | 0.0008                  |
| 9 2 7         | 10   | 8 2 6            | 9     | 6651.8552             | 0.0016                  |
| 9 2 8         | 9    | 8 2 7            | 8     | 6522.5714             | 0.0013                  |
| 9 2 8         | 8    | 8 2 7            | 7     | 6522.6068             | 0.0008                  |
| 9 2 8         | 10   | 8 2 7            | 9     | 6522.6170             | 0.0016                  |
| 9 3 7         | 9    | 8 3 6            | 8     | 6560.3352             | 0.0066                  |
| 9 3 7         | 8    | 8 3 6            | 7     | 6560.4257             | 0.0000                  |
| 9 3 7         | 10   | 8 3 6            | 9     | 6560.4257             | -0.0001                 |
| 9 3 6         | 9    | 8 3 5            | 8     | 6572.2354             | -0.0003                 |
| 9 3 6         | 8    | 8 3 5            | 7     | 6572.3335             | -0.0009                 |
| 9 3 6         | 10   | 8 3 5            | 9     | 6572.3334             | -0.0010                 |
| 10 0 10       | 11   | 9 0 9            | 10    | 7105.0986             | 0.0011                  |
| 10 0 10       | 10   | 9 0 9            | 9     | 7105.0925             | -0.0038                 |
| 10 0 10       | 9    | 9 0 9            | 8     | 7105.0817             | -0.0023                 |
| 10 1 10       | 11   | 9 1 9            | 10    | 7044.6002             | 0.0007                  |
| 10 1 10       | 10   | 9 1 9            | 9     | 7044.5869             | -0.0013                 |
| 10 1 10       | 9    | 9 1 9            | 8     | 7044.5869             | -0.0004                 |

---

|    |   |    |    |    |   |    |    |           |         |
|----|---|----|----|----|---|----|----|-----------|---------|
| 10 | 1 | 9  | 11 | 9  | 1 | 8  | 10 | 7398.3731 | -0.0012 |
| 10 | 1 | 9  | 10 | 9  | 1 | 8  | 9  | 7398.3651 | 0.0001  |
| 10 | 1 | 9  | 9  | 9  | 1 | 8  | 8  | 7398.3574 | -0.0042 |
| 10 | 2 | 9  | 10 | 9  | 2 | 8  | 9  | 7240.7934 | 0.0005  |
| 10 | 2 | 9  | 9  | 9  | 2 | 8  | 8  | 7240.8204 | 0.0030  |
| 10 | 2 | 9  | 11 | 9  | 2 | 8  | 10 | 7240.8275 | 0.0013  |
| 10 | 2 | 8  | 10 | 9  | 2 | 7  | 9  | 7407.2305 | -0.0007 |
| 10 | 2 | 8  | 9  | 9  | 2 | 7  | 8  | 7407.2608 | 0.0009  |
| 10 | 2 | 8  | 11 | 9  | 2 | 7  | 10 | 7407.2716 | 0.0030  |
| 10 | 3 | 8  | 10 | 9  | 3 | 7  | 9  | 7290.9890 | 0.0006  |
| 10 | 3 | 8  | 9  | 9  | 3 | 7  | 8  | 7291.0603 | 0.0027  |
| 10 | 3 | 8  | 11 | 9  | 3 | 7  | 10 | 7291.0603 | 0.0001  |
| 10 | 3 | 7  | 10 | 9  | 3 | 6  | 9  | 7311.0909 | -0.0015 |
| 10 | 3 | 7  | 9  | 9  | 3 | 6  | 8  | 7311.1663 | 0.0025  |
| 10 | 3 | 7  | 11 | 9  | 3 | 6  | 10 | 7311.1663 | 0.0000  |
| 10 | 4 | 7  | 10 | 9  | 4 | 6  | 9  | 7287.9518 | -0.0010 |
| 10 | 4 | 7  | 9  | 9  | 4 | 6  | 8  | 7288.0823 | 0.0000  |
| 10 | 4 | 7  | 11 | 9  | 4 | 6  | 10 | 7288.0750 | -0.0014 |
| 10 | 4 | 6  | 10 | 9  | 4 | 5  | 9  | 7288.7346 | -0.0022 |
| 10 | 4 | 6  | 9  | 9  | 4 | 5  | 8  | 7288.8648 | -0.0016 |
| 10 | 4 | 6  | 11 | 9  | 4 | 5  | 10 | 7288.8587 | -0.0019 |
| 11 | 0 | 11 | 11 | 10 | 0 | 10 | 10 | 7792.4185 | 0.0022  |
| 11 | 0 | 11 | 10 | 10 | 0 | 10 | 9  | 7792.4012 | -0.0050 |
| 11 | 0 | 11 | 12 | 10 | 0 | 10 | 11 | 7792.4185 | 0.0011  |
| 11 | 1 | 11 | 12 | 10 | 1 | 10 | 11 | 7741.5564 | 0.0011  |
| 11 | 1 | 11 | 11 | 10 | 1 | 10 | 10 | 7741.5448 | -0.0018 |
| 11 | 1 | 11 | 10 | 10 | 1 | 10 | 9  | 7741.5448 | -0.0003 |
| 11 | 1 | 10 | 11 | 10 | 1 | 9  | 10 | 8120.8036 | 0.0034  |
| 11 | 1 | 10 | 10 | 10 | 1 | 9  | 9  | 8120.7924 | -0.0032 |
| 11 | 1 | 10 | 12 | 10 | 1 | 9  | 11 | 8120.8107 | 0.0044  |
| 11 | 2 | 10 | 11 | 10 | 2 | 9  | 10 | 7957.0555 | 0.0039  |
| 11 | 2 | 10 | 10 | 10 | 2 | 9  | 9  | 7957.0671 | -0.0016 |
| 11 | 2 | 10 | 12 | 10 | 2 | 9  | 11 | 7957.0781 | 0.0015  |
| 11 | 2 | 9  | 11 | 10 | 2 | 8  | 10 | 8162.5860 | -0.0004 |
| 11 | 2 | 9  | 10 | 10 | 2 | 8  | 9  | 8162.6059 | -0.0009 |
| 11 | 2 | 9  | 12 | 10 | 2 | 8  | 11 | 8162.6157 | 0.0009  |
| 11 | 3 | 9  | 11 | 10 | 3 | 8  | 10 | 8021.4693 | 0.0001  |
| 11 | 3 | 9  | 10 | 10 | 3 | 8  | 9  | 8021.5195 | -0.0005 |
| 11 | 3 | 9  | 12 | 10 | 3 | 8  | 11 | 8021.5247 | 0.0009  |
| 11 | 3 | 8  | 11 | 10 | 3 | 7  | 10 | 8053.4551 | -0.0014 |
| 11 | 3 | 8  | 10 | 10 | 3 | 7  | 9  | 8053.5103 | 0.0002  |
| 11 | 3 | 8  | 12 | 10 | 3 | 7  | 11 | 8053.5142 | 0.0005  |
| 11 | 4 | 8  | 11 | 10 | 4 | 7  | 10 | 8019.6757 | 0.0010  |
| 11 | 4 | 8  | 10 | 10 | 4 | 7  | 9  | 8019.7695 | -0.0010 |

---

---

|    |   |    |    |    |   |    |    |            |         |
|----|---|----|----|----|---|----|----|------------|---------|
| 11 | 4 | 8  | 12 | 10 | 4 | 7  | 11 | 8019.7695  | 0.0010  |
| 11 | 4 | 7  | 11 | 10 | 4 | 6  | 10 | 8021.2332  | -0.0001 |
| 11 | 4 | 7  | 10 | 10 | 4 | 6  | 9  | 8021.3246  | -0.0049 |
| 11 | 4 | 7  | 12 | 10 | 4 | 6  | 11 | 8021.3246  | -0.0028 |
| 12 | 0 | 12 | 12 | 11 | 0 | 11 | 11 | 8478.6183  | -0.0019 |
| 12 | 0 | 12 | 11 | 11 | 0 | 11 | 10 | 8478.6081  | -0.0041 |
| 12 | 0 | 12 | 13 | 11 | 0 | 11 | 12 | 8478.6203  | -0.0010 |
| 12 | 1 | 12 | 11 | 11 | 1 | 11 | 10 | 8437.2045  | -0.0011 |
| 12 | 1 | 12 | 12 | 11 | 1 | 11 | 11 | 8437.2045  | -0.0030 |
| 12 | 1 | 12 | 13 | 11 | 1 | 11 | 12 | 8437.2154  | 0.0011  |
| 12 | 1 | 11 | 11 | 11 | 1 | 10 | 10 | 8837.4164  | 0.0001  |
| 12 | 1 | 11 | 12 | 11 | 1 | 10 | 11 | 8837.4223  | 0.0007  |
| 12 | 1 | 11 | 13 | 11 | 1 | 10 | 12 | 8837.4223  | -0.0029 |
| 12 | 2 | 11 | 11 | 11 | 2 | 10 | 10 | 8671.2396  | 0.0047  |
| 12 | 2 | 11 | 12 | 11 | 2 | 10 | 11 | 8671.2263  | 0.0036  |
| 12 | 2 | 11 | 13 | 11 | 2 | 10 | 12 | 8671.2472  | 0.0052  |
| 12 | 2 | 10 | 11 | 11 | 2 | 9  | 10 | 8916.4052  | -0.0013 |
| 12 | 2 | 10 | 12 | 11 | 2 | 9  | 11 | 8916.3905  | -0.0015 |
| 12 | 2 | 10 | 13 | 11 | 2 | 9  | 12 | 8916.4133  | -0.0003 |
| 13 | 0 | 13 | 12 | 12 | 0 | 12 | 11 | 9164.5270  | -0.0040 |
| 13 | 0 | 13 | 13 | 12 | 0 | 12 | 12 | 9164.5378  | 0.0003  |
| 13 | 0 | 13 | 14 | 12 | 0 | 12 | 13 | 9164.5378  | -0.0009 |
| 13 | 1 | 13 | 12 | 12 | 1 | 12 | 11 | 9131.7158  | 0.0012  |
| 13 | 1 | 13 | 13 | 12 | 1 | 12 | 12 | 9131.7204  | 0.0038  |
| 13 | 1 | 13 | 14 | 12 | 1 | 12 | 13 | 9131.7268  | 0.0048  |
| 13 | 1 | 12 | 12 | 12 | 1 | 11 | 11 | 9547.7087  | 0.0020  |
| 13 | 1 | 12 | 13 | 12 | 1 | 11 | 12 | 9547.7134  | 0.0007  |
| 13 | 1 | 12 | 14 | 12 | 1 | 11 | 13 | 9547.7134  | -0.0010 |
| 13 | 2 | 12 | 12 | 12 | 2 | 11 | 11 | 9383.2258  | 0.0018  |
| 13 | 2 | 12 | 13 | 12 | 2 | 11 | 12 | 9383.2186  | 0.0033  |
| 13 | 2 | 12 | 14 | 12 | 2 | 11 | 13 | 9383.2339  | 0.0036  |
| 13 | 2 | 11 | 12 | 12 | 2 | 10 | 11 | 9667.4363  | -0.0044 |
| 13 | 2 | 11 | 13 | 12 | 2 | 10 | 12 | 9667.4274  | -0.0032 |
| 13 | 2 | 11 | 14 | 12 | 2 | 10 | 13 | 9667.4453  | -0.0017 |
| 14 | 0 | 14 | 15 | 13 | 0 | 13 | 14 | 9850.6730  | -0.0018 |
| 14 | 0 | 14 | 14 | 13 | 0 | 13 | 13 | 9850.6730  | -0.0004 |
| 14 | 0 | 14 | 13 | 13 | 0 | 13 | 12 | 9850.6633  | -0.0049 |
| 14 | 1 | 14 | 13 | 13 | 1 | 13 | 12 | 9825.2265  | -0.0016 |
| 14 | 1 | 14 | 14 | 13 | 1 | 13 | 13 | 9825.2265  | -0.0036 |
| 14 | 1 | 14 | 15 | 13 | 1 | 13 | 14 | 9825.2351  | 0.0006  |
| 14 | 1 | 13 | 13 | 13 | 1 | 12 | 12 | 10251.4667 | 0.0010  |
| 14 | 1 | 13 | 14 | 13 | 1 | 12 | 13 | 10251.4738 | 0.0017  |
| 14 | 1 | 13 | 15 | 13 | 1 | 12 | 14 | 10251.4738 | 0.0013  |

---



Table S2. Experimental transitions frequencies of isomer II of the C<sub>2</sub>F<sub>4</sub>S<sub>2</sub>-IPA complex.

| $J'_{Ka'Kc'}$ | $F'$ | $J''_{Ka''Kc''}$ | $F''$ | $V_{obs.}/\text{MHz}$ | $Obs.-Calc./\text{MHz}$ |
|---------------|------|------------------|-------|-----------------------|-------------------------|
| 8 0 8         | 9    | 7 0 7            | 8     | 6087.7037             | -0.0020                 |
| 8 0 8         | 8    | 7 0 7            | 7     | 6087.6925             | 0.0049                  |
| 8 0 8         | 7    | 7 0 7            | 6     | 6087.6978             | 0.0057                  |
| 8 1 8         | 9    | 7 1 7            | 8     | 6024.2254             | -0.0005                 |
| 8 1 8         | 8    | 7 1 7            | 7     | 6024.2112             | 0.0044                  |
| 8 1 8         | 7    | 7 1 7            | 6     | 6024.2112             | -0.0011                 |
| 8 1 7         | 9    | 7 1 6            | 8     | 6425.7099             | -0.0001                 |
| 8 1 7         | 8    | 7 1 6            | 7     | 6425.6987             | 0.0104                  |
| 8 1 7         | 7    | 7 1 6            | 6     | 6425.6987             | -0.0014                 |
| 9 0 9         | 10   | 8 0 8            | 9     | 6815.6265             | 0.0004                  |
| 9 0 9         | 9    | 8 0 8            | 8     | 6815.6073             | -0.0028                 |
| 9 0 9         | 8    | 8 0 8            | 7     | 6815.6148             | -0.0003                 |
| 9 1 9         | 9    | 8 1 8            | 8     | 6765.8932             | -0.0004                 |
| 9 1 9         | 8    | 8 1 8            | 7     | 6765.8983             | 0.0002                  |
| 9 1 9         | 10   | 8 1 8            | 9     | 6765.9050             | -0.0040                 |
| 9 1 8         | 9    | 8 1 7            | 8     | 7201.0755             | -0.0030                 |
| 9 1 8         | 8    | 8 1 7            | 7     | 7201.0900             | -0.0002                 |
| 9 1 8         | 10   | 8 1 7            | 9     | 7201.0989             | 0.0006                  |
| 9 2 7         | 9    | 8 2 6            | 8     | 7271.2976             | 0.0042                  |
| 9 2 7         | 8    | 8 2 6            | 7     | 7271.3088             | -0.0023                 |
| 9 2 7         | 10   | 8 2 6            | 9     | 7271.3184             | 0.0011                  |
| 10 0 10       | 11   | 9 0 9            | 10    | 7542.4625             | 0.0012                  |
| 10 0 10       | 10   | 9 0 9            | 9     | 7542.4461             | -0.0014                 |
| 10 0 10       | 9    | 9 0 9            | 8     | 7542.4533             | 0.0009                  |
| 10 1 10       | 11   | 9 1 9            | 10    | 7505.3592             | -0.0008                 |
| 10 1 10       | 10   | 9 1 9            | 9     | 7505.3427             | -0.0047                 |
| 10 1 10       | 9    | 9 1 9            | 8     | 7505.3475             | -0.0035                 |
| 10 1 9        | 11   | 9 1 8            | 10    | 7965.1859             | -0.0036                 |
| 10 1 9        | 10   | 9 1 8            | 9     | 7965.1714             | 0.0004                  |
| 10 1 9        | 9    | 9 1 8            | 8     | 7965.1751             | -0.0080                 |
| 10 2 9        | 10   | 9 2 8            | 9     | 7783.1276             | -0.0003                 |
| 10 2 9        | 9    | 9 2 8            | 8     | 7783.1480             | -0.0020                 |
| 10 2 9        | 11   | 9 2 8            | 10    | 7783.1568             | 0.0013                  |
| 10 2 8        | 10   | 9 2 7            | 9     | 8092.3525             | 0.0006                  |
| 10 2 8        | 9    | 9 2 7            | 8     | 8092.3620             | -0.0026                 |
| 10 2 8        | 11   | 9 2 7            | 10    | 8092.3699             | -0.0001                 |
| 10 3 8        | 10   | 9 3 7            | 9     | 7888.9873             | 0.0011                  |
| 10 3 8        | 9    | 9 3 7            | 8     | 7889.0326             | 0.0009                  |
| 10 3 8        | 11   | 9 3 7            | 10    | 7889.0326             | -0.0007                 |
| 10 3 7        | 10   | 9 3 6            | 9     | 7962.3951             | 0.0015                  |
| 10 3 7        | 9    | 9 3 6            | 8     | 7962.4348             | 0.0029                  |
| 10 3 7        | 11   | 9 3 6            | 10    | 7962.4348             | 0.0008                  |

---

|    |   |    |    |    |   |    |    |           |         |
|----|---|----|----|----|---|----|----|-----------|---------|
| 10 | 4 | 7  | 10 | 9  | 4 | 6  | 9  | 7892.8162 | -0.0012 |
| 10 | 4 | 7  | 9  | 9  | 4 | 6  | 8  | 7892.9026 | 0.0014  |
| 10 | 4 | 7  | 11 | 9  | 4 | 6  | 10 | 7892.8952 | -0.0021 |
| 10 | 4 | 6  | 10 | 9  | 4 | 5  | 9  | 7897.8871 | -0.0022 |
| 10 | 4 | 6  | 9  | 9  | 4 | 5  | 8  | 7897.9733 | 0.0010  |
| 10 | 4 | 6  | 11 | 9  | 4 | 5  | 10 | 7897.9679 | -0.0006 |
| 11 | 0 | 11 | 12 | 10 | 0 | 10 | 11 | 8269.6093 | 0.0004  |
| 11 | 0 | 11 | 11 | 10 | 0 | 10 | 10 | 8269.5962 | -0.0010 |
| 11 | 0 | 11 | 10 | 10 | 0 | 10 | 9  | 8269.6026 | 0.0011  |
| 11 | 1 | 11 | 12 | 10 | 1 | 10 | 11 | 8242.9521 | 0.0029  |
| 11 | 1 | 11 | 11 | 10 | 1 | 10 | 10 | 8242.9382 | -0.0001 |
| 11 | 1 | 11 | 10 | 10 | 1 | 10 | 9  | 8242.9473 | 0.0057  |
| 11 | 1 | 10 | 11 | 10 | 1 | 9  | 10 | 8717.2870 | 0.0008  |
| 11 | 1 | 10 | 10 | 10 | 1 | 9  | 9  | 8717.2977 | -0.0012 |
| 11 | 1 | 10 | 12 | 10 | 1 | 9  | 11 | 8717.3048 | 0.0005  |
| 11 | 2 | 10 | 11 | 10 | 2 | 9  | 10 | 8543.9836 | 0.0016  |
| 11 | 2 | 10 | 10 | 10 | 2 | 9  | 9  | 8544.0025 | 0.0030  |
| 11 | 2 | 10 | 12 | 10 | 2 | 9  | 11 | 8544.0089 | 0.0045  |
| 11 | 2 | 9  | 11 | 10 | 2 | 8  | 10 | 8906.7745 | 0.0000  |
| 11 | 2 | 9  | 10 | 10 | 2 | 8  | 9  | 8906.7842 | -0.0005 |
| 11 | 2 | 9  | 12 | 10 | 2 | 8  | 11 | 8906.7906 | 0.0011  |
| 11 | 3 | 9  | 11 | 10 | 3 | 8  | 10 | 8676.3612 | -0.0008 |
| 11 | 3 | 9  | 10 | 10 | 3 | 8  | 9  | 8676.3991 | 0.0031  |
| 11 | 3 | 9  | 12 | 10 | 3 | 8  | 11 | 8676.3991 | 0.0008  |
| 11 | 3 | 8  | 11 | 10 | 3 | 7  | 10 | 8788.3327 | 0.0002  |
| 11 | 3 | 8  | 10 | 10 | 3 | 7  | 9  | 8788.3554 | -0.0024 |
| 11 | 3 | 8  | 12 | 10 | 3 | 7  | 11 | 8788.3554 | -0.0053 |
| 11 | 4 | 8  | 11 | 10 | 4 | 7  | 10 | 8687.9286 | 0.0026  |
| 11 | 4 | 8  | 10 | 10 | 4 | 7  | 9  | 8687.9877 | 0.0002  |
| 11 | 4 | 8  | 12 | 10 | 4 | 7  | 11 | 8687.9877 | 0.0015  |
| 11 | 4 | 7  | 11 | 10 | 4 | 6  | 10 | 8697.8926 | -0.0018 |
| 11 | 4 | 7  | 10 | 10 | 4 | 6  | 9  | 8697.9529 | -0.0017 |
| 11 | 4 | 7  | 12 | 10 | 4 | 6  | 11 | 8697.9529 | -0.0005 |
| 12 | 0 | 12 | 11 | 11 | 0 | 11 | 10 | 8997.6435 | -0.0036 |
| 12 | 0 | 12 | 12 | 11 | 0 | 11 | 11 | 8997.6389 | -0.0046 |
| 12 | 0 | 12 | 13 | 11 | 0 | 11 | 12 | 8997.6526 | -0.0008 |
| 12 | 1 | 12 | 12 | 11 | 1 | 11 | 11 | 8979.0404 | 0.0013  |
| 12 | 1 | 12 | 11 | 11 | 1 | 11 | 10 | 8979.0404 | -0.0014 |
| 12 | 1 | 12 | 13 | 11 | 1 | 11 | 12 | 8979.0520 | 0.0037  |
| 12 | 1 | 11 | 12 | 11 | 1 | 10 | 11 | 9458.0320 | 0.0033  |
| 12 | 1 | 11 | 11 | 11 | 1 | 10 | 10 | 9458.0404 | -0.0013 |
| 12 | 1 | 11 | 13 | 11 | 1 | 10 | 12 | 9458.0478 | 0.0015  |

---
